# Supplementary material
Source: PubMed Central journal article supplement (PMC4795828)
Supplement: NIHMS761584-supplement-Suplementary_material.pdf [file NIHMS761584-supplement-Suplementary_material.pdf]

Figure 1. Hypothetical model for the relationship between baseline natriuretic peptide levels and the development of type 2 diabetes.

The mechanisms that may explain the inverse association between natriuretic peptides (NP) and a decreased risk of incident diabetes are shown in supplemental figure 1. A decrease in NP synthesis, resistance to NP, the release of biologically inactive NP, or an increase in the clearance of NP can lead to a substantial and prolonged decrease in the physiological effects of NP [1, 2]. Less NP can lead at a molecular level, to a decrease activation of the gene that codes for the peroxisome proliferator-activated receptor  $\gamma$  coactivator-1  $\alpha$  (PGC1A). This gene is essential in regulating energy metabolism and mitochondrial biogenesis [3]. This can lead to a decrease in fat and glucose oxidation, lower mitochondrial density [4], accumulation of visceral and liver fat [5] and insulin resistance [6]. Furthermore, NP are involved in vessel growth, thus low levels of NP may be associated with a decreased formation of capillaries [7]. Collectively, mitochondrial and microvascular dysfunction are all implicated in the development of insulin resistance [8, 9], which is a primary risk factor in the development of type 2 DM. In agreement that an increase in NP, within the normal range, is associated with improved glucose control, the Look AHEAD clinical trial showed that those individuals assigned to the lifestyle intervention group had a 22% increase in NT-proBNP and that this was inversely associated with change in BMI and HbA<sub>1c</sub> [10]. Similar results were reported by Chainani-Wu N. et al [11] who describes that changes in BNP were inversely associated with change in insulin and BMI. These findings further support the notion that within a physiological range (50 to 100 pg/mL), higher levels of NT-proBNP may lower BMI, improve glucose metabolism and prevent the development of diabetes.

## References.

- [1] Bartels ED, Nielsen JM, Bisgaard LS, Goetze JP, Nielsen LB (2010) Decreased expression of natriuretic peptides associated with lipid accumulation in cardiac ventricle of obese mice. *Endocrinology* 151: 5218-5225
- [2] Sengenès C, Berlan M, De Glisezinski I, Lafontan M, Galitzky J (2000) Natriuretic peptides: a new lipolytic pathway in human adipocytes. *FASEB Journal* 14: 1345-1351
- [3] Engeli S, Birkenfeld AL, Badin PM, et al. (2012) Natriuretic peptides enhance the oxidative capacity of human skeletal muscle. *Journal of Clinical Investigation* 122: 4675-4679
- [4] Miyashita K, Itoh H, Tsujimoto H, et al. (2009) Natriuretic peptides/cGMP/cGMP-dependent protein kinase cascades promote muscle mitochondrial biogenesis and prevent obesity. *Diabetes* 58: 2880-2892
- [5] Neeland IJ, Winders BR, Ayers CR, et al. (2013) Higher natriuretic peptide levels associate with a favorable adipose tissue distribution profile. *Journal of the American College of Cardiology* 62: 752-760
- [6] Sczelecki S, Besse-Patin A, Abboud A, et al. (2014) Loss of Pgc-1alpha expression in aging mouse muscle potentiates glucose intolerance and systemic inflammation. *Am J Physiol Endocrinol Metab* 306: E157-167
- [7] Kuhn M, Volker K, Schwarz K, et al. (2009) The natriuretic peptide/guanylyl cyclase--a system functions as a stress-responsive regulator of angiogenesis in mice. *Journal of Clinical Investigation* 119: 2019-2030

- [8] Cooney GJ, Turner N, Kraegen E, Bruce CR (2013) Fatty acid metabolism, energy expenditure and insulin resistance in muscle. *J Endocrinol*
- [9] Clark MG (2008) Impaired microvascular perfusion: a consequence of vascular dysfunction and a potential cause of insulin resistance in muscle. *Am J Physiol Endocrinol Metab* 295: E732-750
- [10] Bertoni AG, Wagenknecht LE, Kitzman DW, Marcovina SM, Rushing JT, Espeland MA (2012) Impact of the look AHEAD intervention on NT-pro brain natriuretic peptide in overweight and obese adults with diabetes. *Obesity (Silver Spring)* 20: 1511-1518
- [11] Chainani-Wu N, Weidner G, Purnell DM, et al. (2010) Relation of B-type natriuretic peptide levels to body mass index after comprehensive lifestyle changes. *American Journal of Cardiology* 105: 1570-1576
